# Supplementary material
Source: Research Square preprint supplement (doi:10.21203/rs.3.rs-9859396/v1)
Supplement: Supplementary file 1 [file 7cdb91ebca9573bf992f08c1.pdf]

# Commodity portfolios mediate climate-driven wealth inequality

## Supplementary Information

### Cross-commodity climate sensitivity

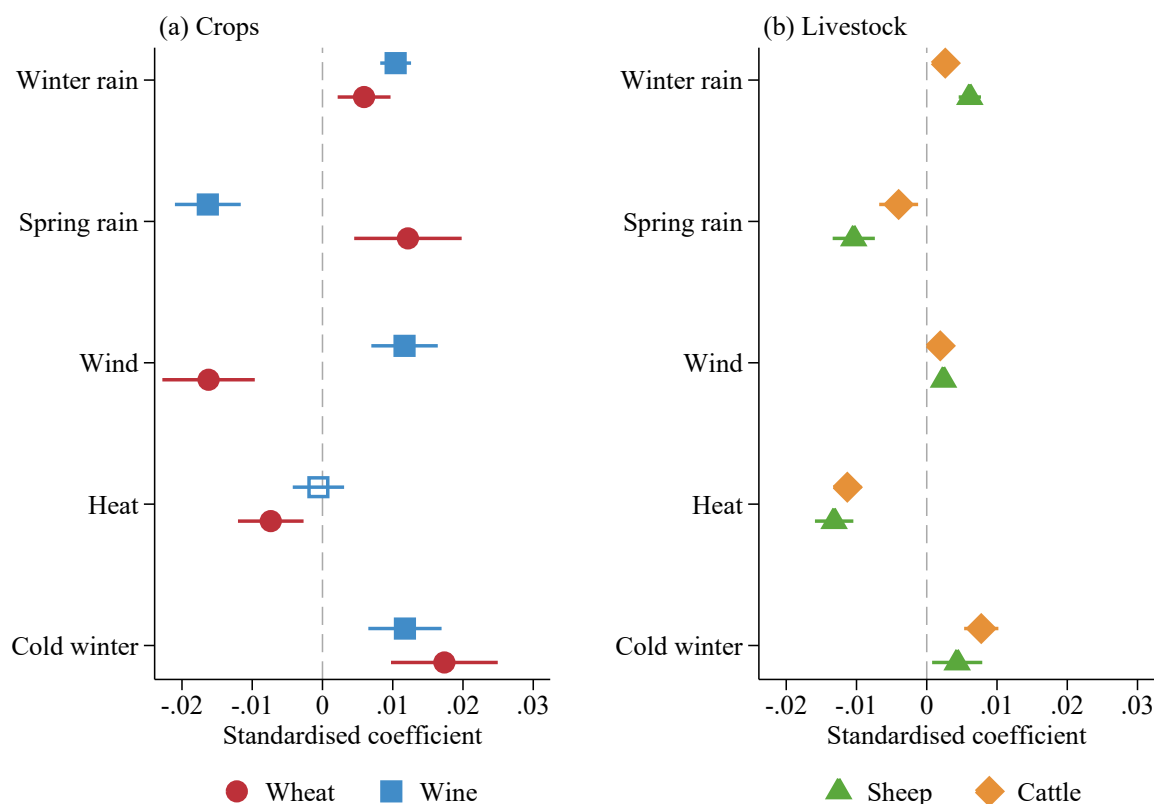

Supplementary Fig. 1: Standardised climate coefficients across all four commodities. Coefficients from Table 1 divided by the outcome standard deviation to permit cross-commodity comparison. Panel (a) shows crops (wheat and wine). Panel (b) shows livestock (sheep and cattle). Filled markers indicate significance at 5%.

# Crop calendar

Supplementary Table 1: Agricultural calendar for wheat and wine at the eighteenth-century Cape

| Month                                  | Wheat            | Wine                 |
|----------------------------------------|------------------|----------------------|
| <i>Year t – 1. Growing season</i>      |                  |                      |
| April                                  | Fallow           | Post-harvest pruning |
| May                                    | Ploughing        | Dormancy             |
| June                                   | Sowing           | Dormancy             |
| July                                   | Tillering        | Winter pruning       |
| August                                 | Tillering        | Winter pruning       |
| September                              | Grain fill       | Bud break            |
| October                                | Grain fill       | Flowering            |
| November                               | Maturation       | Fruit set            |
| December                               | Harvest begins   | Berry development    |
| <i>Year t. Harvest and enumeration</i> |                  |                      |
| January                                | Harvest          | Ripening             |
| February                               | Threshing        | Vintage              |
| March                                  | Harvest complete | Vintage              |

[Notes] Based on Wallace's agricultural calendar for viticulture and field crops. The table follows the crop year ending with the March *opgaaf*. April–December fall in year  $t - 1$ , while January–March fall in census year  $t$ . Wheat sowing occurs May–June; harvest runs December–February. Vines are pruned after vintage and again in winter.

# Stayer robustness

Supplementary Table 2: Stayer robustness in the multivariate cross-year specification

|                               | Full sample                    | Stayers only                   |
|-------------------------------|--------------------------------|--------------------------------|
| <i>Wheat (FD, cross-year)</i> |                                |                                |
| Growing rain                  | 0.421 <sup>***</sup> (0.002)   | 0.622 <sup>***</sup> (0.005)   |
| Wind (harvest)                | -1.153 <sup>***</sup> (<0.001) | -0.874 <sup>**</sup> (0.024)   |
| $R^2$                         | 0.076                          | 0.075                          |
| $N$                           | 1,289                          | 679                            |
| <i>Wine (FE, cross-year)</i>  |                                |                                |
| Winter rain                   | 0.205 <sup>***</sup> (<0.001)  | 0.250 <sup>***</sup> (<0.001)  |
| Spring rain                   | -0.320 <sup>***</sup> (<0.001) | -0.301 <sup>***</sup> (<0.001) |
| $R_w^2$                       | 0.101                          | 0.089                          |
| $N$                           | 3,589                          | 1,792                          |

[Notes] Key coefficients from the multivariate cross-year specification. The full sample includes households observed at least five years. Stayers are households present from at least 1770 to 1780.  $p$ -values in parentheses. Wheat uses first differences; wine uses household fixed effects. \*  $p < 0.10$ ; \*\*  $p < 0.05$ ; \*\*\*  $p < 0.01$ .

# First differences versus fixed effects

Supplementary Table 3: First differences versus fixed effects in multivariate cross-year specifications

|                        | Wheat  |        | Wine  |       |
|------------------------|--------|--------|-------|-------|
|                        | FD     | FE     | FD    | FE    |
| $R^2 / R_w^2$          | 0.076  | 0.021  | 0.163 | 0.101 |
| $N$                    | 1,289  | 2,169  | 2,539 | 3,589 |
| Growing rain           | 0.421  | -0.259 | n.a.  | n.a.  |
| Wind (harvest/vintage) | -1.153 | 0.045  | n.a.  | n.a.  |
| Winter rain            | n.a.   | n.a.   | 0.173 | 0.205 |

[Notes] Multivariate cross-year specification. FD denotes first-differenced OLS. FE denotes household fixed effects. Wheat is the primary case. The FD estimator is preferred because it removes slow-moving confounds that attenuate the FE coefficients. Wine coefficients are consistent across estimators. The baseline net PCI and the FD/FE net PCI correlate at 0.963.

Supplementary Table 4: Household descriptive statistics by wealth tercile

|                            | T1 (poorest) | T2    | T3 (wealthiest) |
|----------------------------|--------------|-------|-----------------|
| <i>Wealth and assets</i>   |              |       |                 |
| Mean wealth (rd)           | 14           | 282   | 2654            |
| Enslaved people            | 1.2          | 2.3   | 9.7             |
| Sheep                      | 163.3        | 268.8 | 392.6           |
| Wheat ( <i>muids</i> )     | 36.0         | 46.6  | 77.0            |
| Wine ( <i>leaguers</i> )   | 6.9          | 9.9   | 22.2            |
| <i>Portfolio shares</i>    |              |       |                 |
| Enslaved share of wealth   | 0.7%         | 20.1% | 65.1%           |
| Livestock share of wealth  | 1.8%         | 33.6% | 20.5%           |
| <i>Participation rates</i> |              |       |                 |
| Wheat producers            | 0.1%         | 1.2%  | 19.1%           |
| Wine producers             | 0.2%         | 2.9%  | 31.8%           |
| Sheep holders              | 0.4%         | 32.8% | 59.9%           |
| Cattle holders             | 1.1%         | 39.4% | 80.7%           |
| Households                 | 373          | 932   | 804             |

[Notes] Sample restricted to households observed for at least five years. Wealth is monetised using auction prices for enslaved people, cattle, sheep, and horses. Terciles are defined on time-averaged household wealth. Production and asset figures are conditional means among holders. Participation rates are the share of household-years in which the commodity is held or produced.  $N = 26,561$  household-year observations across 2,109 households.

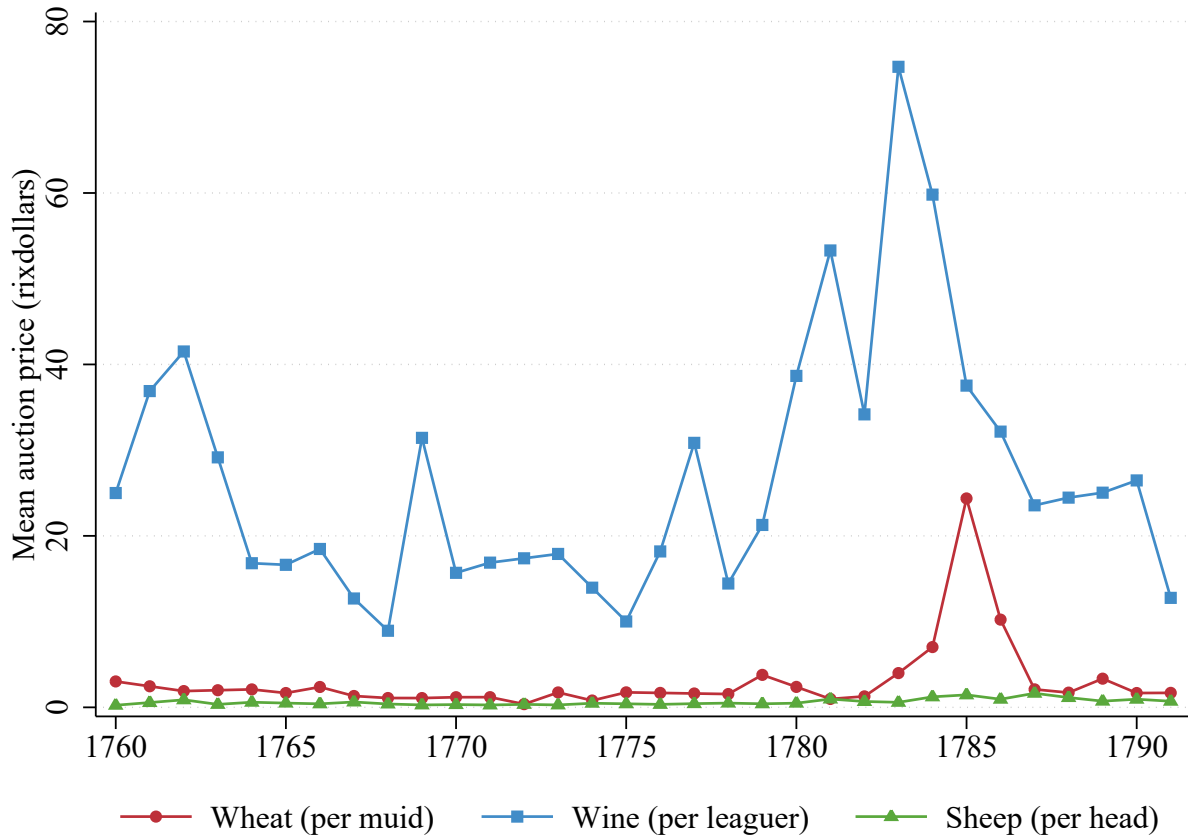

Supplementary Fig. 2: Mean auction prices for wheat (per *muid*), wine (per *leaguer*), and sheep (per head), 1760–1791. Wheat and wine prices show no clear systematic movement with predicted local output. Sheep prices are more volatile and are tested separately in the main text.

# Exposure and inequality diagnostics

Supplementary Table 5: Exposure dispersion under alternative household weighting schemes

| Exposure measure                                 | $\hat{\beta}$ | SE    | $p$   | $R^2$ |
|--------------------------------------------------|---------------|-------|-------|-------|
| Indicator exposure on baseline PCI               | 12.76         | 9.18  | 0.177 | 0.206 |
| Household-mean scale exposure on baseline PCI    | 26.26         | 15.91 | 0.111 | 0.263 |
| Lagged scale exposure on baseline PCI            | 27.09         | 12.52 | 0.040 | 0.411 |
| Household-mean scale exposure on crop-only PCI   | 17.72         | 18.85 | 0.356 | 0.120 |
| Lagged crop-only scale exposure on crop-only PCI | 12.90         | 11.39 | 0.268 | 0.183 |

[Notes] Each row reports a year-level OLS regression of the cross-sectional standard deviation of predicted household climate impact on a standardised PCI measure, with robust standard errors. Indicator exposure assigns households the commodity-specific PCI when they produce or hold the commodity. Household-mean scale exposure weights each commodity by the household's mean output or stock relative to the annual mean. Lagged scale exposure weights each commodity by lagged output or stock relative to the annual mean. Crop-only variants use wheat and wine only.

Supplementary Table 6: Additional diagnostics for generated PCI, distributional exposure, accumulation, prices and placebo leads

| Diagnostic                                               | Target                           | $\hat{\beta}$ | SE/SD   | $p$ /share | $N$ /reps |
|----------------------------------------------------------|----------------------------------|---------------|---------|------------|-----------|
| <i>Panel A. Generated-regressor bootstrap</i>            |                                  |               |         |            |           |
| Parametric first-stage coefficient bootstrap             | Gini on rebuilt PCI              | 0.0087        | 0.0005  | 1.000      | 1,000     |
| Household-cluster full-pipeline bootstrap                | Gini on rebuilt PCI              | 0.0124        | 0.0029  | 0.975      | 199       |
| <i>Panel B. Model-consistent distributional exposure</i> |                                  |               |         |            |           |
| Exposure-wealth covariance                               | Current measured-asset Gini      | 0.0069        | 0.0023  | 0.007      | 25        |
| Crop-only exposure-wealth covariance                     | Current measured-asset Gini      | 0.0060        | 0.0019  | 0.005      | 25        |
| T3-T1 exposure gap                                       | Current T3-T1 wealth gap         | 690.62        | 171.22  | <0.001     | 25        |
| T3-T1 exposure gap with trend                            | Current T3-T1 wealth gap         | 186.29        | 102.87  | 0.084      | 25        |
| <i>Panel C. Household-level accumulation</i>             |                                  |               |         |            |           |
| All-commodity lagged scale exposure                      | $\Delta$ measured assets         | 48.1530       | 13.2489 | <0.001     | 19,727    |
| All-commodity lagged scale exposure                      | $\Delta$ IHS measured assets     | 0.0199        | 0.0082  | 0.015      | 19,727    |
| Crop-only lagged scale exposure                          | $\Delta$ no-livestock assets     | 50.7805       | 13.1877 | <0.001     | 19,728    |
| Crop-only lagged scale exposure                          | $\Delta$ IHS no-livestock assets | 0.0184        | 0.0082  | 0.025      | 19,728    |
| <i>Panel D. Auction-price robustness</i>                 |                                  |               |         |            |           |
| Wheat mean auction price                                 | Wheat PCI                        | 0.0845        | 0.0921  | 0.369      | 23        |
| Wine mean auction price                                  | Wine PCI                         | -0.6902       | 0.7570  | 0.372      | 24        |
| Sheep median auction price                               | Sheep PCI                        | 0.0030        | 0.0013  | 0.032      | 27        |
| <i>Panel E. Placebo leads</i>                            |                                  |               |         |            |           |
| Future baseline PCI                                      | Current measured-asset Gini      | 0.0053        | 0.0023  | 0.030      | 24        |
| Future exposure gap                                      | Current T3-T1 wealth gap         | 733.67        | 148.31  | <0.001     | 24        |

[Notes] Panel A reports generated-regressor bootstraps. SE/SD is the standard deviation of bootstrap coefficients;  $p$ /share is the share of replications with  $p < 0.05$ . Panel B reports year-level regressions using lagged scale-weighted household exposure. Panel C reports household-level regressions of next-year asset change on standardised lagged scale-weighted exposure, controlling for current assets and year fixed effects, with standard errors clustered by household. Panel D reports additional auction-price checks. Panel E reports placebo-lead checks.

# Extensive margin and production participation

Supplementary Table 7: Extensive margin and production participation

|                                                 | Wheat producer                         | Wine producer                    | Sheep holder                          |
|-------------------------------------------------|----------------------------------------|----------------------------------|---------------------------------------|
| <i>Panel A. FE with trend (full sample)</i>     |                                        |                                  |                                       |
| PCI                                             | -0.0006 <sup>***</sup><br>( $<0.001$ ) | 0.0011 <sup>***</sup><br>(0.004) | 0.0001 <sup>**</sup><br>(0.026)       |
| Trend                                           | Yes                                    | Yes                              | Yes                                   |
| <i>Panel B. First differences (full sample)</i> |                                        |                                  |                                       |
| $\Delta$ PCI                                    | 0.0004 <sup>*</sup><br>(0.051)         | 0.0004<br>(0.262)                | 0.0000<br>(0.358)                     |
| <i>Panel C. FE with trend (stayers only)</i>    |                                        |                                  |                                       |
| PCI                                             | -0.0011 <sup>***</sup><br>( $<0.001$ ) | 0.0007<br>(0.226)                | 0.0004 <sup>***</sup><br>( $<0.001$ ) |
| Trend                                           | Yes                                    | Yes                              | Yes                                   |
| Household FE / $\Delta$                         | Yes                                    | Yes                              | Yes                                   |

[Notes] Dependent variable is a binary indicator equal to one if the household produces the commodity in that year. PCI is the commodity-specific Predicted Climate Impact. Panel A uses household fixed effects with a linear time trend. Panel B uses first-differenced OLS. Panel C repeats Panel A for stayer households.  $p$ -values in parentheses. \*  $p < 0.10$ ; \*\*  $p < 0.05$ ; \*\*\*  $p < 0.01$ .

# PCI and inequality robustness

Supplementary Table 8: Robustness checks for PCI and measured asset inequality

| Specification                      | $\hat{\beta}$ | SE     | $p$   | $R^2$ |
|------------------------------------|---------------|--------|-------|-------|
| Baseline PCI                       | 0.0088        | 0.0032 | 0.011 | 0.277 |
| Leave-one-year-out PCI             | 0.0052        | 0.0034 | 0.138 | 0.098 |
| Crop-only PCI                      | 0.0052        | 0.0027 | 0.069 | 0.095 |
| Baseline PCI, no livestock wealth  | 0.0100        | 0.0050 | 0.056 | 0.232 |
| Crop-only PCI, no livestock wealth | 0.0048        | 0.0042 | 0.262 | 0.054 |
| Baseline PCI with linear trend     | 0.0018        | 0.0030 | 0.550 | 0.533 |
| Baseline PCI with quadratic trend  | 0.0024        | 0.0031 | 0.442 | 0.543 |

[Notes] Each row reports a year-level OLS regression of the measured asset Gini on a standardised PCI measure, with robust standard errors. The leave-one-year-out PCI re-estimates commodity-specific climate responses excluding the predicted year and then predicts that omitted year; its correlation with the in-sample PCI is 0.789. Crop-only PCI excludes livestock components from the PCI. No livestock wealth excludes cattle and sheep from the dependent-variable wealth measure. Trend specifications add linear or linear plus quadratic year controls.

Supplementary Table 9: Alternative distributional PCI variants

| Diagnostic                                      | Target                      | $\hat{\beta}$ | SE     | $p$    | $N$ |
|-------------------------------------------------|-----------------------------|---------------|--------|--------|-----|
| LOO crop-only exposure–wealth covariance        | Current measured-asset Gini | 0.0051        | 0.0016 | 0.004  | 25  |
| LOO crop-only T3–T1 exposure gap                | Current T3–T1 wealth gap    | 395.48        | 173.20 | 0.032  | 25  |
| LOO crop-only exposure gap with trend           | Current T3–T1 wealth gap    | 161.92        | 103.91 | 0.133  | 25  |
| LOO crop-only exposure gap with decade controls | Current T3–T1 wealth gap    | -22.32        | 98.10  | 0.822  | 25  |
| Fixed pre-period all-commodity exposure gap     | Current T3–T1 wealth gap    | 690.47        | 179.94 | <0.001 | 27  |
| Fixed pre-period exposure gap with trend        | Current T3–T1 wealth gap    | 118.88        | 119.86 | 0.331  | 27  |

[Notes] LOO means leave-one-year-out commodity-response estimation, where the commodity climate responses used to predict year  $t$  are estimated without year  $t$ . Crop-only variants use wheat and wine only, removing livestock from the PCI construction. Fixed pre-period exposure uses household portfolios observed in 1761–1769.

# Wealth gap and portfolio climate impact

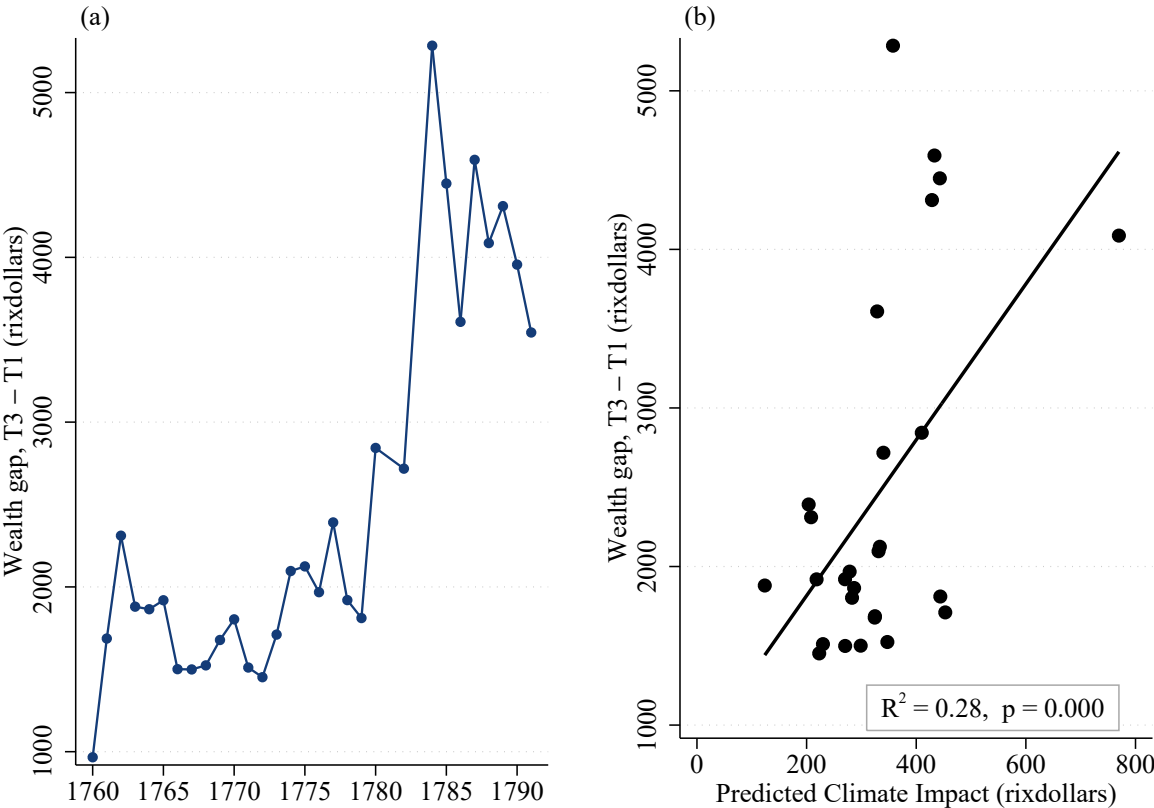

Supplementary Fig. 3: Wealth gap and climate. Panel (a) shows the T3-T1 wealth gap (mean wealth of richest tercile minus mean wealth of poorest tercile) over time. Panel (b) shows the wealth gap regressed on the PCI ( $R^2 = 0.28, p < 0.001$ ).

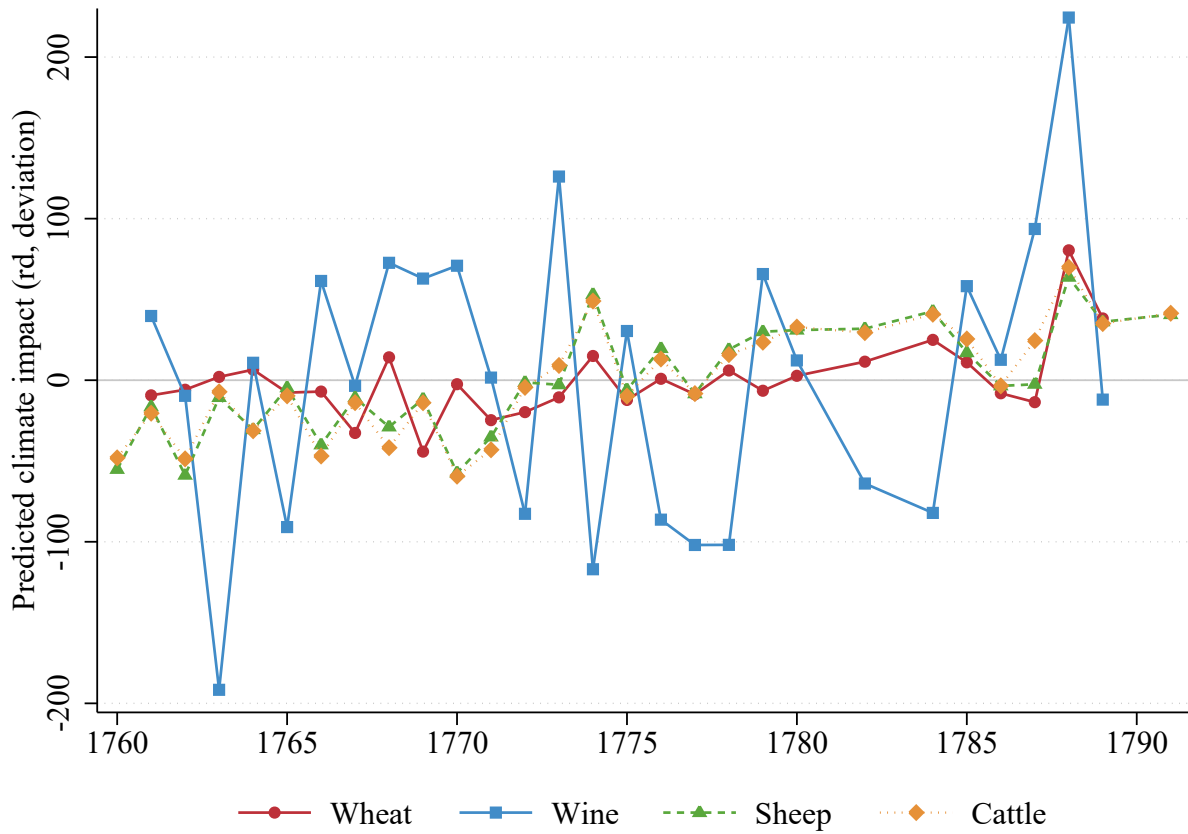

Supplementary Fig. 4: Commodity-specific Predicted Climate Impact (deviation from mean, in *rixdollars*), 1760–1791. When the wheat PCI dips, the wine PCI typically rises, reflecting the opposing seasonal channels documented in Table 1.

## Predicted climate impact by year

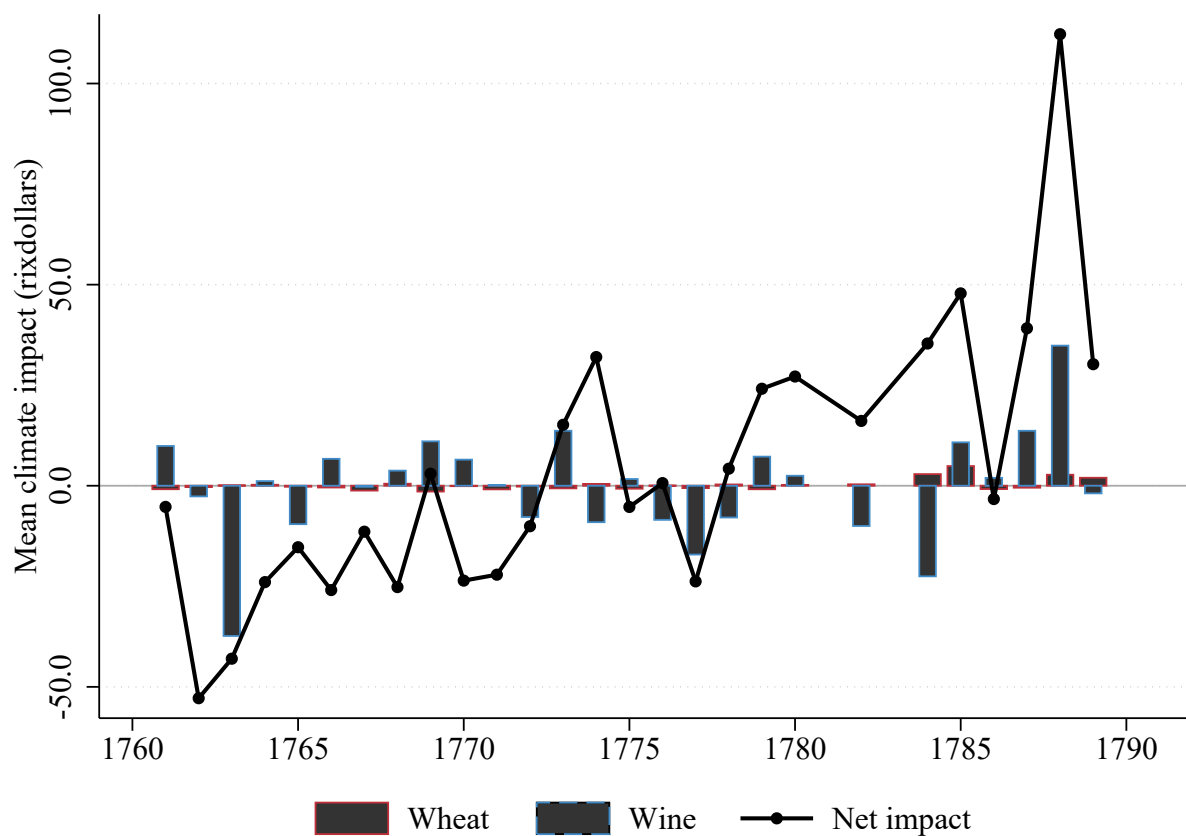

Supplementary Fig. 5: Mean monetised climate impact by year, 1760–1791. Bars show the predicted wheat and wine impacts in *rixdollars*; the line shows the net impact across all commodities.

## Source and method tables

Supplementary Table 10: Auction prices and descriptive statistics (*rixdollars*)

| Commodity               | Mean   | SD    | Min    | Max    |
|-------------------------|--------|-------|--------|--------|
| Enslaved person         | 240.50 | 89.42 | 133.59 | 505.91 |
| Horse                   | 20.39  | 8.79  | 4.90   | 39.81  |
| Cattle (head)           | 6.98   | 2.72  | 3.50   | 16.58  |
| Wine ( <i>leaguer</i> ) | 24.29  | 11.30 | 8.94   | 59.81  |
| Wheat ( <i>muid</i> )   | 3.02   | 4.46  | 0.38   | 24.37  |
| Sheep (head)            | 0.62   | 0.36  | 0.24   | 1.64   |

[Notes] Annual mean unit prices from estate auctions (*vendu rollen*, MOOC 10), 1760–1791. Each row reports the mean across annual price observations, weighting each year equally. Enslaved person prices average across male and female individual sales.

# Household versus year clustering

Supplementary Table 11: Standard error comparison for household versus year clustering

|                                                | $\hat{\beta}$ | SE <sub>hh</sub> | SE <sub>year</sub> | Ratio |
|------------------------------------------------|---------------|------------------|--------------------|-------|
| <i>Panel A. Annual rainfall<sup>a</sup></i>    |               |                  |                    |       |
| Wheat                                          | -0.235        | 0.054            | 0.183              | 3.41  |
| Wine                                           | 0.032         | 0.010            | 0.051              | 5.03  |
| Sheep                                          | -0.469        | 0.112            | 0.650              | 5.78  |
| Cattle                                         | -0.032        | 0.010            | 0.051              | 5.30  |
| <i>Panel B. Predicted Climate Impact (PCI)</i> |               |                  |                    |       |
| Wheat                                          | 1.000         | 0.213            | 0.407              | 1.91  |
| Wine                                           | 1.000         | 0.071            | 0.190              | 2.67  |
| Sheep                                          | 1.000         | 0.093            | 0.219              | 2.34  |
| Cattle                                         | 1.000         | 0.092            | 0.239              | 2.59  |

[Notes] SE<sub>hh</sub> clusters at the household level; SE<sub>year</sub> clusters at the year level. The ratio is SE<sub>year</sub>/SE<sub>hh</sub>. Ratios above 1 indicate that household-clustered standard errors understate uncertainty relative to year-clustered standard errors. Climate varies at the year level. <sup>a</sup>Panel A reports auxiliary univariate annual-rainfall regressions retained for comparison.

# Climate profiles

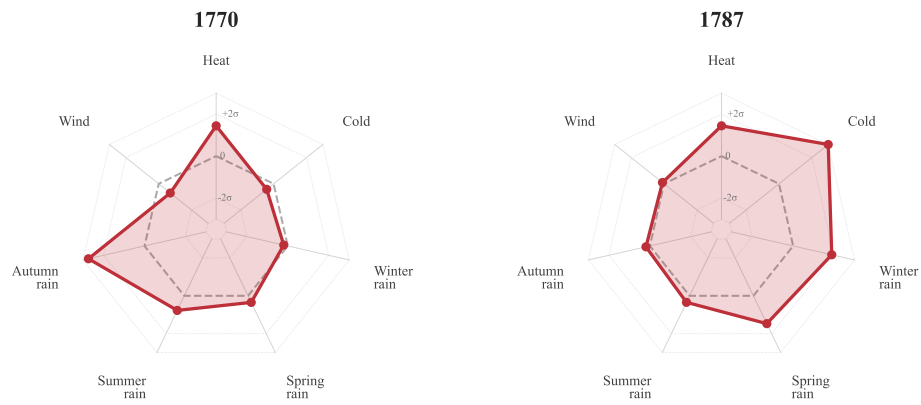

Supplementary Fig. 6: Climate profiles of extreme years. Each year satisfying the extreme criterion ( $|z| > 2.5$  on any dimension, or  $|z| > 2$  on two or more dimensions). Each spoke represents one of seven climate dimensions standardised to  $z$ -scores; the dashed heptagon marks the period mean.

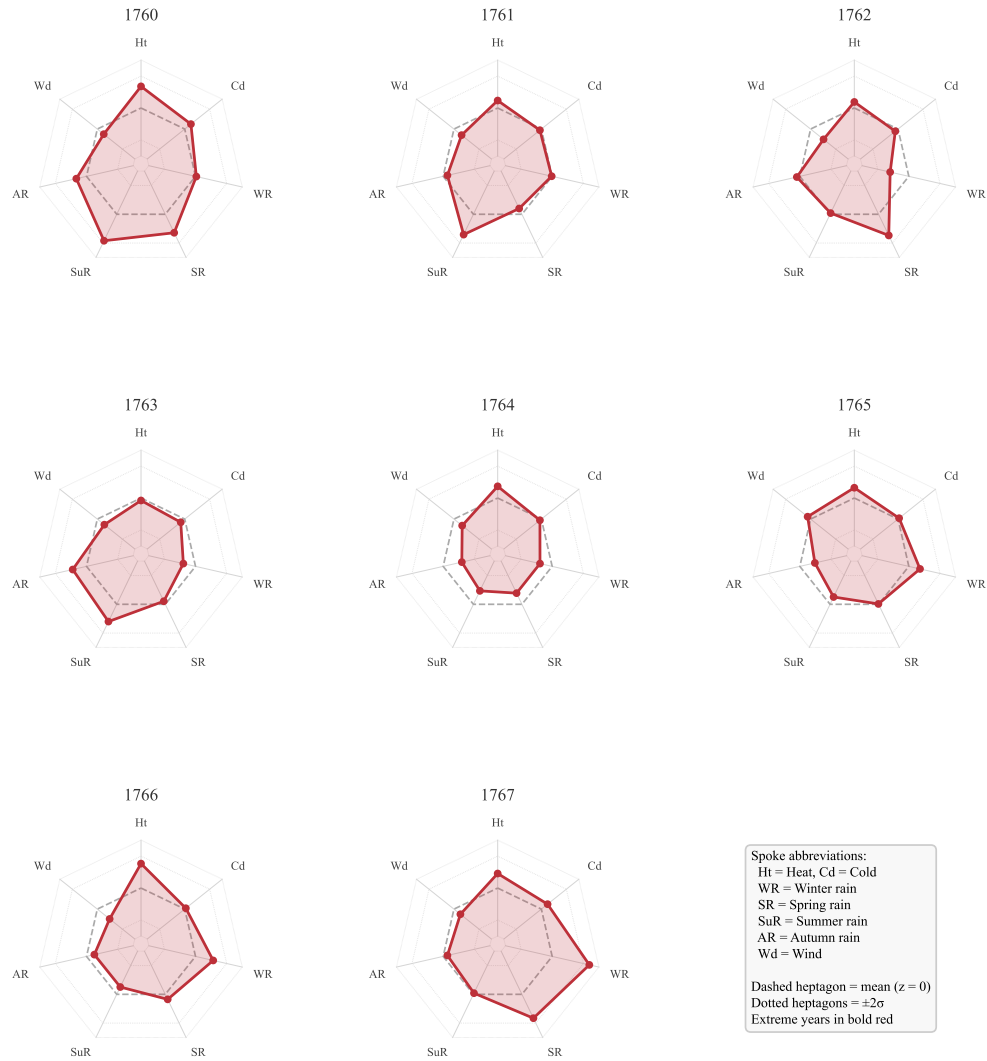

Supplementary Fig. 7: Climate profiles, 1760–1767. Each radar chart displays the seven standardised climate dimensions for one year. Extreme years are labelled in bold red. The dashed heptagon marks the period mean ( $z = 0$ ); dotted heptagons mark  $\pm 2\sigma$ .

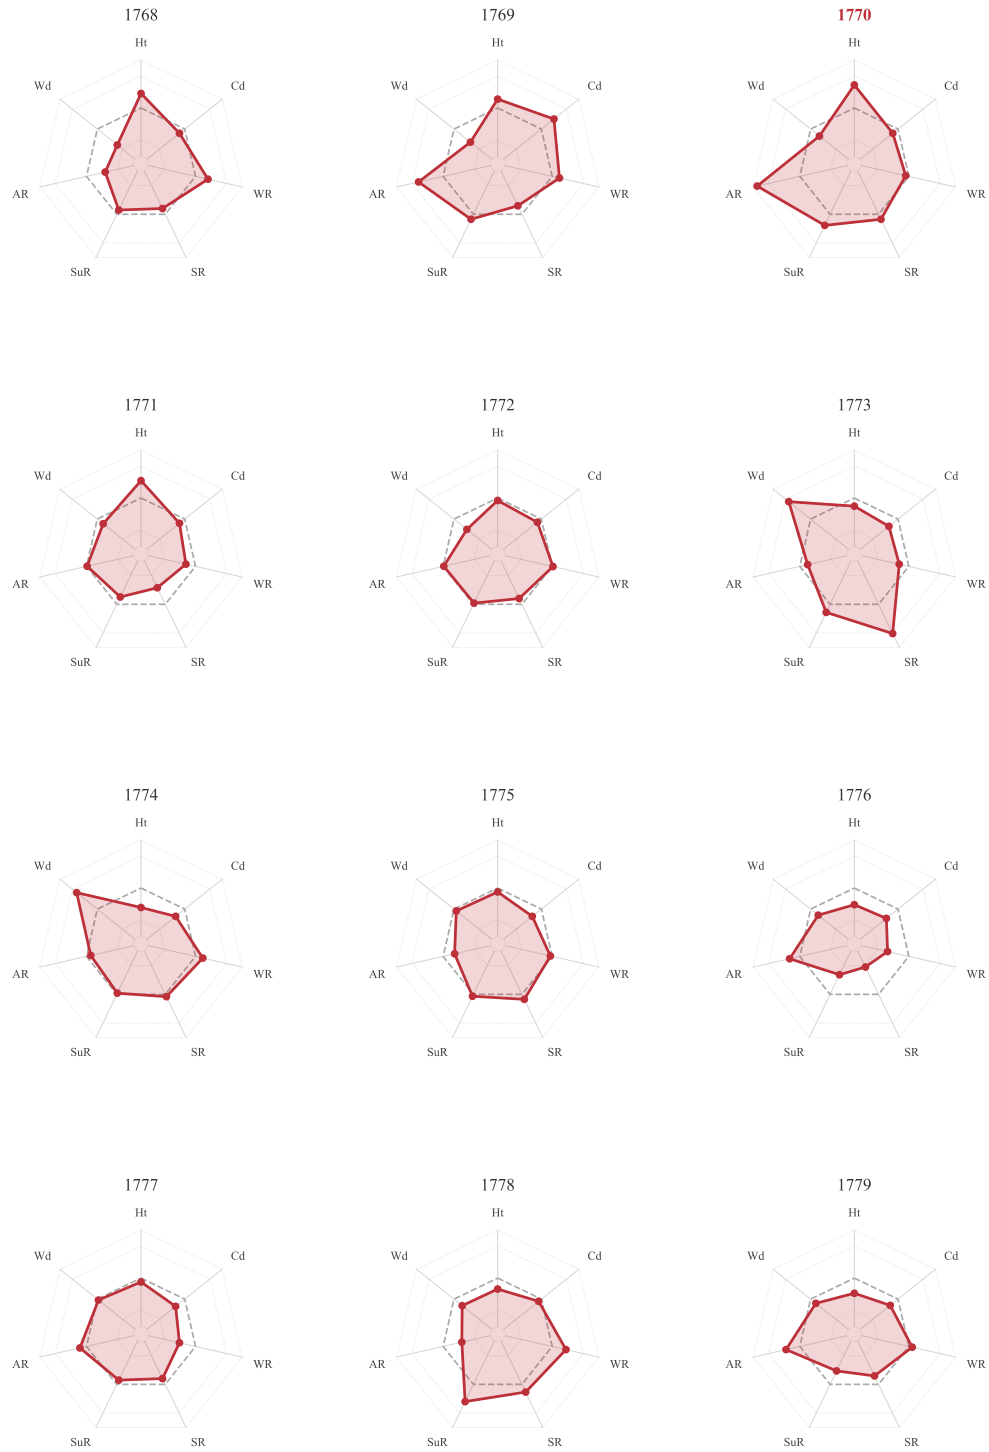

Supplementary Fig. 8: Climate profiles, 1768–1779. See Supplementary Fig. 7 for legend.

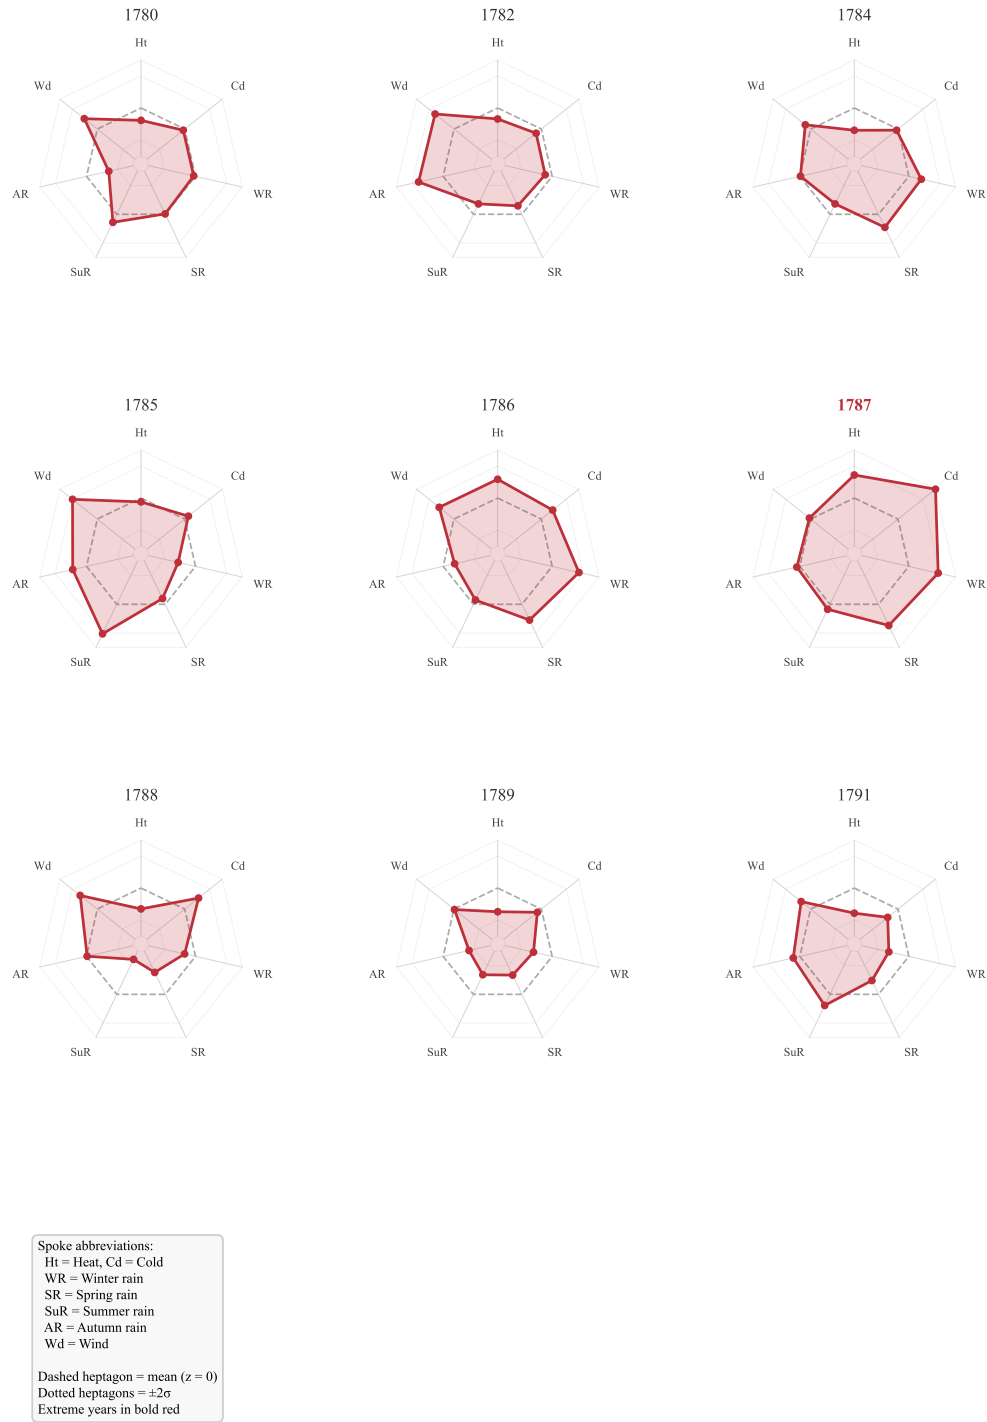

Supplementary Fig. 9: Climate profiles, 1780–1791. Years 1781 and 1783 lack surviving OGR records; 1790 lacks usable climate data. See Supplementary Fig. 7 for legend.
